# Supplementary material for: Massive mobilization of toxic elements from an intact rock glacier in the central Eastern Alps
Source: Copernicus journal article supplement (doi:10.5194/tc-18-5153-2024), 2024-11-14
Supplement: Supplementary file 1 [file tc-18-5153-2024-supplement.pdf]

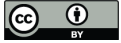

*Supplement of*

## **Massive mobilization of toxic elements from an intact rock glacier in the central Eastern Alps**

**Hoda Moradi et al.**

*Correspondence to:* Hoda Moradi (hoda.moradi@unibe.ch)

The copyright of individual parts of the supplement might differ from the article licence.

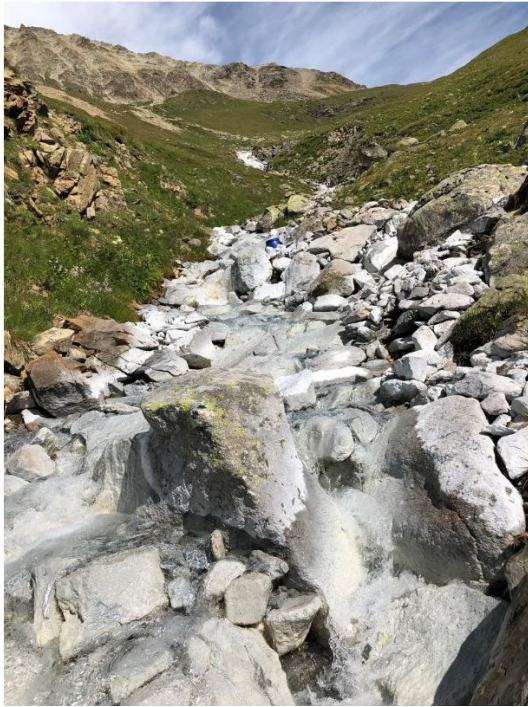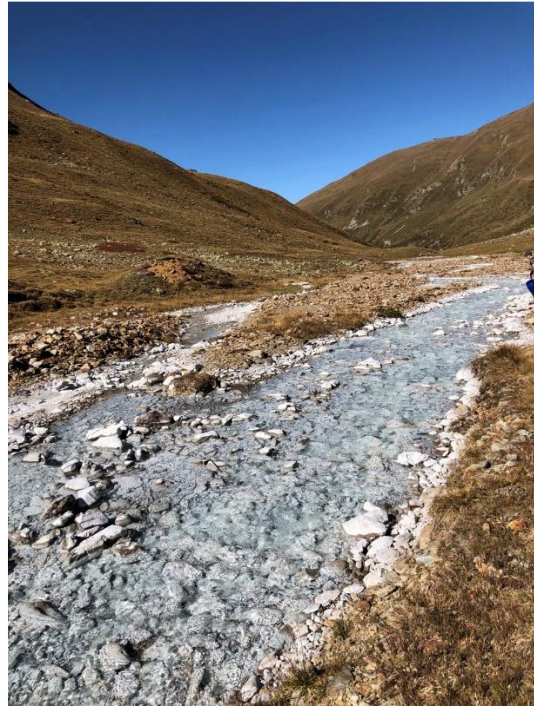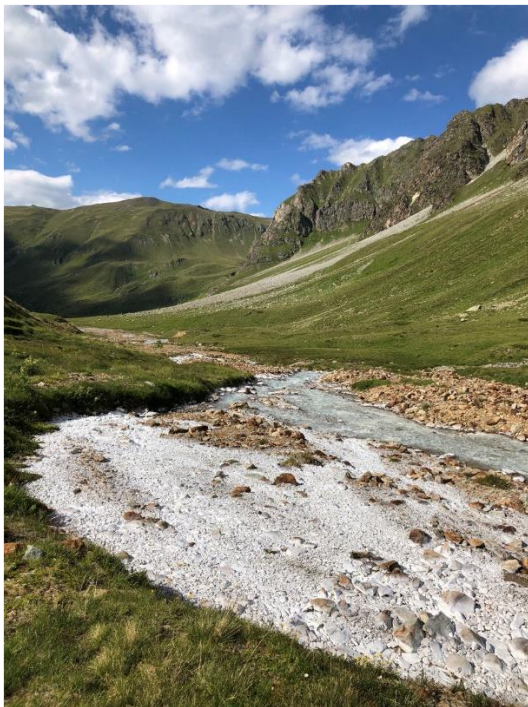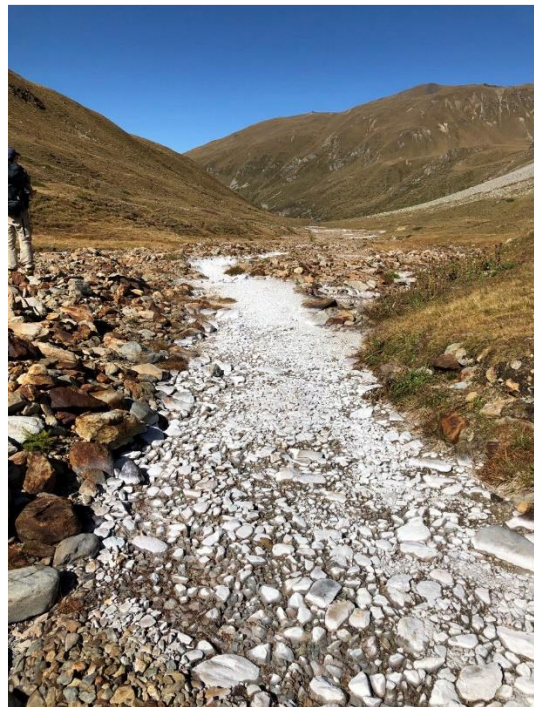

25 **Figure S1: Photographs of the Aua da Prasüra stream, Val Costainas, Switzerland, with white-colored streambed inherited from basaluminite precipitation.**

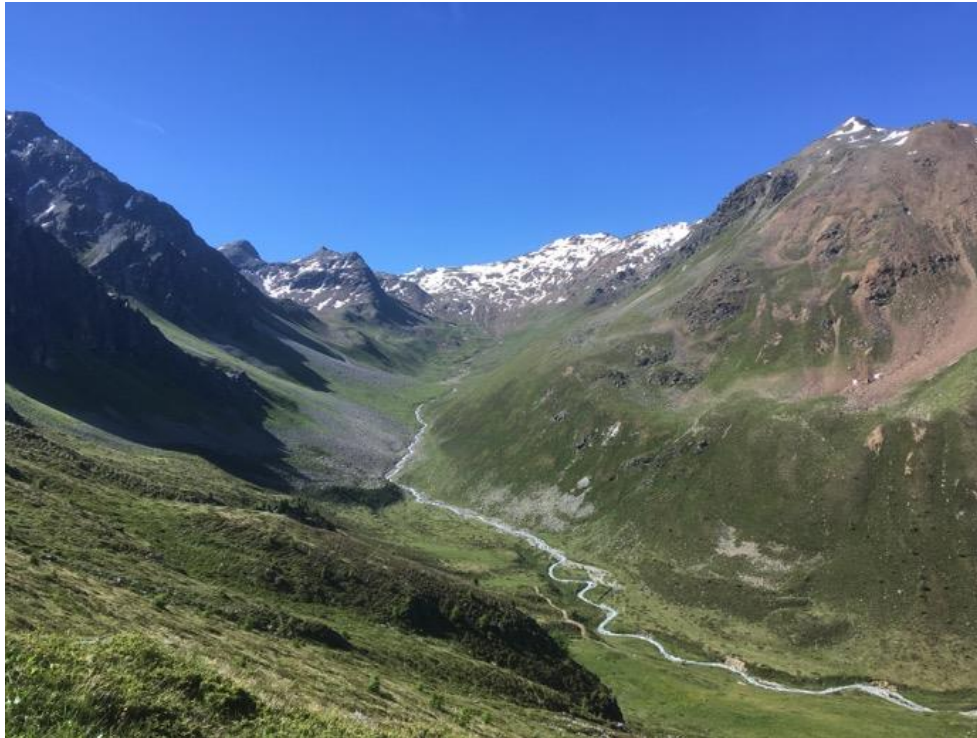

**Figure S2: Picture showing the upper part of the monitored catchment where flow direction of the stream is roughly from South to North.**

### 30 **S1 Tracer discharge measurements**

The manual discharge measurements were carried out with the Sommer TQ-S Tracer System using the well-established tracer-dilution method with NaCl as tracer (e.g. Calkins and Dunne, 1970; Day, 1977; Leibundgut et al., 2009). The Tracer System consists of two electrical conductivity probes connected via Bluetooth to the Software TQ-Commander. For each site, the probes were calibrated with streamwater samples, allowing the calculation of NaCl concentrations based on electrical conductivity values (calculation is executed automatically by the software). When a fixed quantity of NaCl is added upstream, the system automatically quantifies the discharge based on the NaCl concentrations registered at the measurement site (integral of concentration curves). For each discharge quantification, we executed two measurements by using different amounts of salt, resulting in four measurements in total. The reported discharge values constitute the average of these four measurements. Based on the spread of the measurements, the uncertainty of the discharge quantification was well within  $\pm 5\%$ , which is consistent with the maximum measurement uncertainty estimated by the producer company (Sommer). In general, the uncertainty of discharge measurements using the salt dilution method depends on calibration, the amount of used salt and on the measurement setup, i.e. the length of mixing section. The better the salty water is mixed with the stream water, the higher the accuracy of measured discharge values. These aspects were taken into account during the measurements.

## S2 Reconstruction of missing discharge and EC data at AP10 (downstream location)

45 In case of probe malfunctioning, different approaches were applied to reconstruct the missing discharge and concentration data. In the event of water table data loss, the data were handled differently based on the circumstances. In regular situations without any notable meteorological events, a linear interpolation method was employed to reconstruct the missing discharge data. If the data loss occurred immediately after a precipitation event, a typical recession curve equation (Maillet, 1905) was used:

50

$$Q_t = Q_0 e^{-at} \quad (1)$$

$$a = \frac{\log Q_0 - \log Q_t}{0.4343 t} \quad (2)$$

Where  $Q_t$  is the discharge at time  $t$  in  $\text{m}^3 \text{s}^{-1}$ ,  $Q_0$  is the discharge at time 0 in  $\text{m}^3 \text{s}^{-1}$ ,  $t$  is the time between  $Q_0$  and  $Q_t$  in seconds, and  $a$  is the recession coefficient with a unit of  $\text{T}^{-1}$ , collected after the data recording had been resumed. A slightly different approach was used in the event of electrical conductivity measurement problems to reconstruct for the missing data. Since we used these data to estimate solute concentrations, the chemical analyses of the biweekly samples were used to ensure the continuity of the concentration estimates via linear interpolation during such events.

55

## S3 Discharge-water table relationship at AP10

60 The water table-discharge correlation obtained for the downstream location at AP10 is shown in Fig. S3. Above a discharge of ca.  $60 \text{ L s}^{-1}$ , the data nicely follow a polynomial correlation. Nevertheless, we consider discharge estimates below  $100 \text{ L s}^{-1}$  as unreliable because this is exclusively the case in winter when the stream is partially and periodically covered by ice and snow, strongly affecting the hydraulics (i.e. the relevant cross section of the stream) at the measurement location. Thus, for 2021 and 2022 continuous discharge estimates are only used for the period between May and October. The continuous discharge data are presented with the seasonal flux estimates in Fig. 7.

65

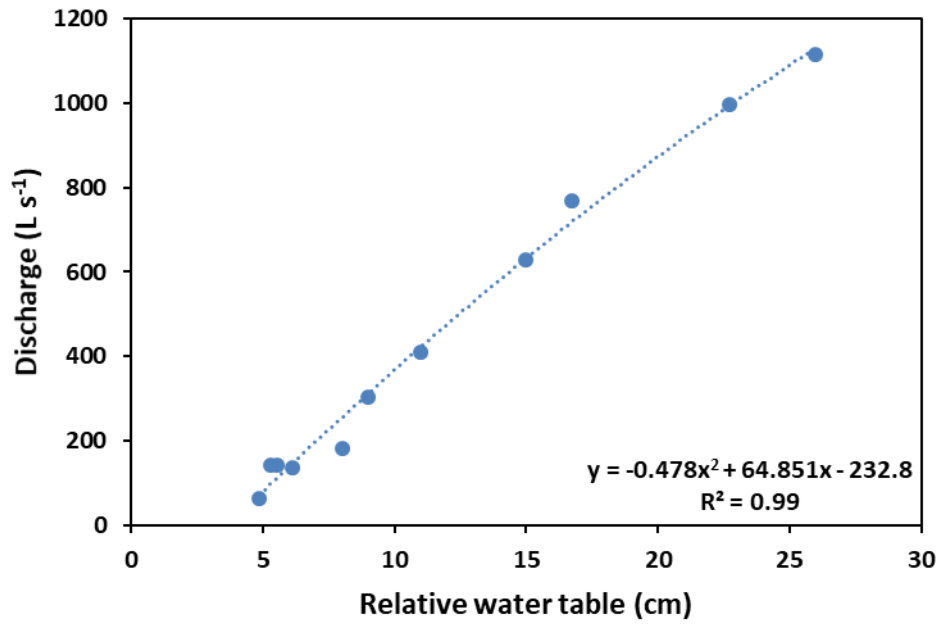

Figure S3: Correlation between water table and manual discharge measurements at the AP10 location and the derived polynomial correlation for water tables above 5 cm. At lower water tables, the correlation does not work, likely because such low values are observed in wintertime, when the hydraulics at the measurement location are strongly affected by freezing.

70

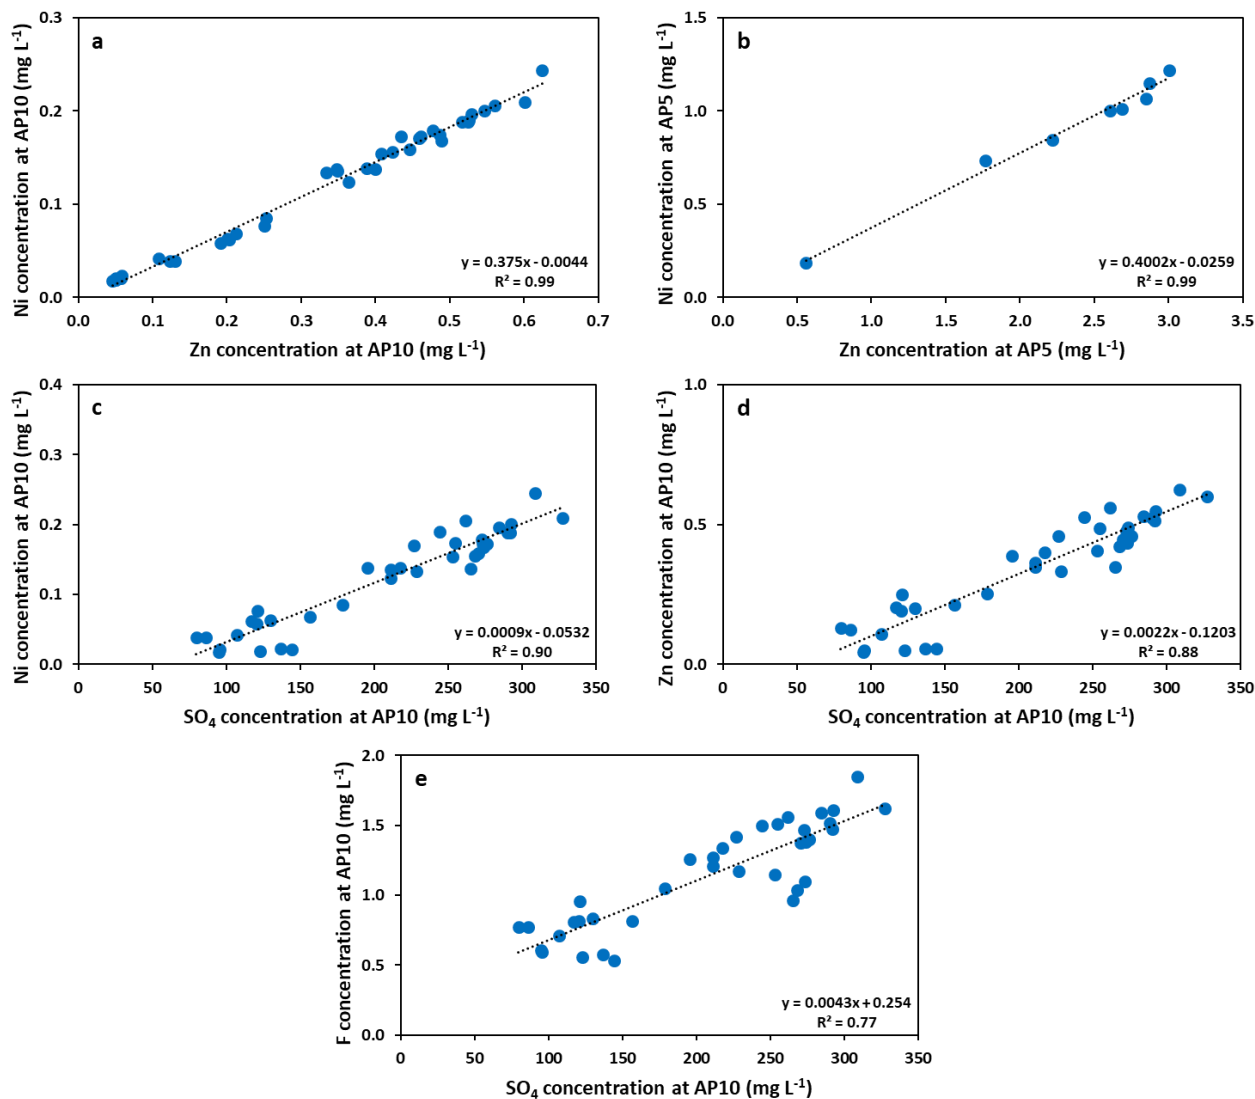

Figure S4. (a) (b): Concentrations of Ni and Zn recorded at AP10 and AP5 respectively. The correlation between the two solutes is excellent and the Ni/Zn concentration ratio is similar at the two locations and very constant throughout the entire monitoring period, demonstrating the conservative behavior of these two solutes. (c), (d), (e): Concentrations of  $\text{SO}_4$  at AP10 plotted vs. those of Ni and Zn and  $\text{F}^-$ , respectively. The rather strong linear correlation indicates that the Ni/ $\text{SO}_4$  and Zn/ $\text{SO}_4$  ratios were very constant throughout the entire monitoring period.

**Table S1: Flux measurements at the two monitoring locations, AP1\_2 and AP5, and the relative contribution of fluxes AP1\_2 / AP5.**

| Date        | Fluxes at AP1_2 (kg day <sup>-1</sup> ) |      | Fluxes at AP5 (kg day <sup>-1</sup> ) |      | Fluxes at AP10 (kg day <sup>-1</sup> ) |      | Relative contribution AP1_2/AP5 (%) |      | Relative contribution AP10/AP5 (%) |      |
|-------------|-----------------------------------------|------|---------------------------------------|------|----------------------------------------|------|-------------------------------------|------|------------------------------------|------|
|             | Ni                                      | Zn   | Ni                                    | Zn   | Ni                                     | Zn   | Ni                                  | Zn   | Ni                                 | Zn   |
| 11 Jun 2021 | -                                       | -    | 2.4                                   | 7.4  | 3.8                                    | 12.5 | -                                   | -    | -                                  | -    |
| 09 Jul 2021 | -                                       | -    | 17.0                                  | 41.0 | 13.3                                   | 33.9 | -                                   | -    | 78.2                               | 82.7 |
| 20 Aug 2021 | 4.1                                     | 9.5  | 5.0                                   | 13.0 | 4.9                                    | 13.8 | 82.8                                | 73.0 | 97.9                               | -    |
| 23 Sep 2021 | 2.0                                     | 4.7  | 2.7                                   | 7.0  | 1.8                                    | 5.1  | 75.4                                | 66.3 | 67.4                               | 73.0 |
| 20 Oct 2021 | 2.1                                     | 4.6  | 2.3                                   | 7.1  | 1.5                                    | 5.1  | 88.4                                | 64.1 | 65.1                               | 71.9 |
| 02 Apr 2022 | -                                       | -    | -                                     | -    | 0.1                                    | 0.3  | -                                   | -    | -                                  | -    |
| 20 May 2022 | -                                       | -    | -                                     | -    | 3.7                                    | 12.2 | -                                   | -    | -                                  | -    |
| 07 Jul 2022 | 5.2                                     | 12.5 | 6.7                                   | 17.5 | 5.3                                    | 14.3 | 78.3                                | 71.5 | 78.5                               | 81.7 |
| 12 Aug 2022 | 3.4                                     | 8.4  | 4.1                                   | 10.9 | 3.5                                    | 9.5  | 82.5                                | 77.2 | 84.8                               | 87.1 |
| 10 Oct 2022 | 1.9                                     | 4.5  | 2.4                                   | 6.5  | 2.0                                    | 5.5  | 76.8                                | 69.6 | 80.2                               | 84.1 |

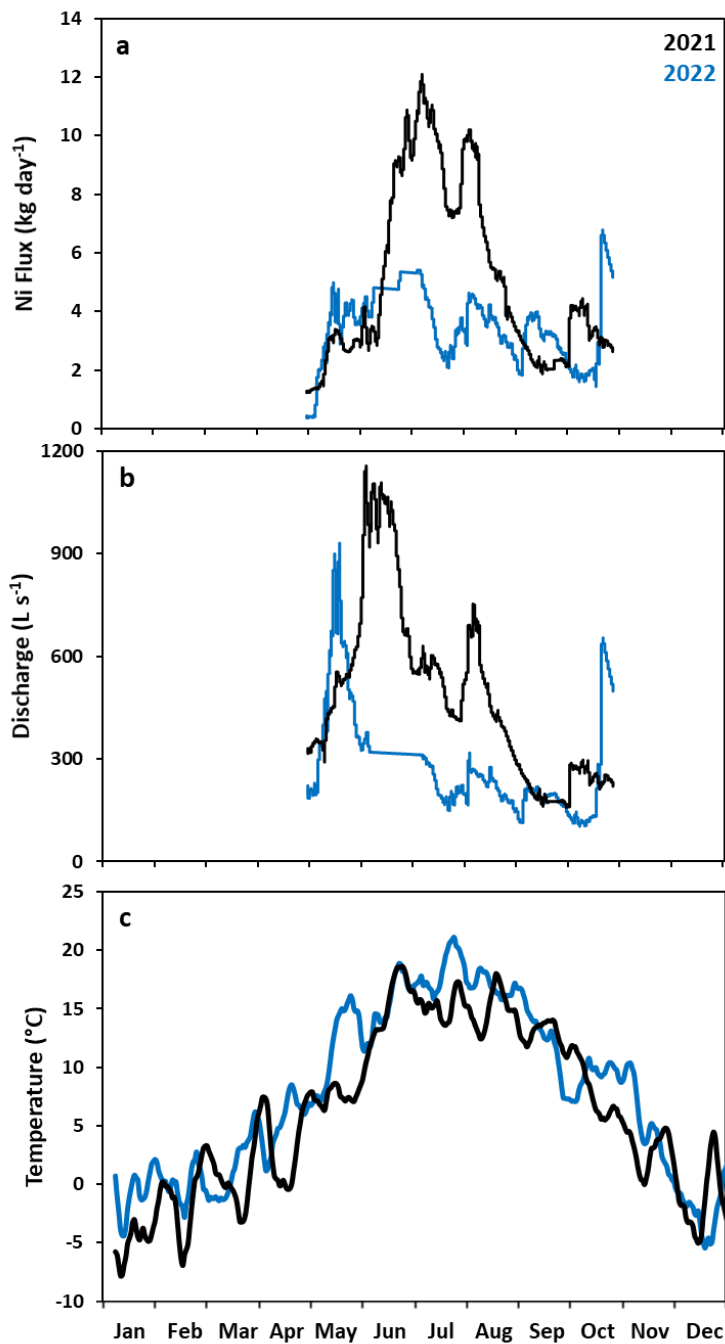

**Figure S5: Comparison of selected parameters between the two monitoring years. (a) Ni fluxes estimated at AP10. (b) Discharge at AP10. (c) Daily average temperature at the MeteoSwiss weather station at Santa Maria (MeteoSwiss, 2023).**



**Table S2: Chemical analysis of streamwater samples collected between March 2021 and November 2022 at the AP10 location of the Aua Prasūra stream (Fig. 1).**

| AP10                               | Method                       | Unit                | 22 Mar 2021 | 09 Apr 2021 | 23 Apr 2021 | 07 May 2021 | 20 May 2021 | 03 Jun 2021 | 10 Jun 2021 | 18 Jun 2021 |
|------------------------------------|------------------------------|---------------------|-------------|-------------|-------------|-------------|-------------|-------------|-------------|-------------|
| <b>T</b>                           | Electrode                    | °C                  | n.a.        | n.a.        | n.a.        | n.a.        | n.a.        | n.a.        | 5.9         | n.a.        |
| <b>pH</b>                          | Electrode                    | -                   | 7.08        | 6.59        | 6.51        | 6.44        | 6.44        | 6.45        | 7.14        | 6.17        |
| <b>EC<sup>1</sup></b>              | Electrode of installed probe | µS cm <sup>-1</sup> | n.a.        | n.a.        | n.a.        | n.a.        | 288         | 229         | 220         | 287         |
| <b>Na<sup>+</sup></b>              | IC                           | mg L <sup>-1</sup>  | 1.95        | 1.79        | 1.79        | 1.78        | 1.81        | 1.53        | 1.41        | 1.67        |
| <b>K<sup>+</sup></b>               | IC                           | mg L <sup>-1</sup>  | <1          | <1          | <1          | <1          | <1          | <1          | <1          | <1          |
| <b>Ca<sup>2+</sup></b>             | IC                           | mg L <sup>-1</sup>  | 31.4        | 27.1        | 27.3        | 27.0        | 26.8        | 21.2        | 19.2        | 23.1        |
| <b>Mg<sup>2+</sup></b>             | IC                           | mg L <sup>-1</sup>  | 15.4        | 13.2        | 13.0        | 14.1        | 15.3        | 12.6        | 11.7        | 16.3        |
| <b>Al</b>                          | ICP-OES                      | mg L <sup>-1</sup>  | <0.05       | <0.05       | <0.05       | <0.05       | <0.05       | 0.050       | 0.057       | 0.098       |
| <b>Co</b>                          | ICP-OES                      | mg L <sup>-1</sup>  | <0.005      | <0.005      | <0.005      | <0.005      | <0.005      | <0.005      | <0.005      | <0.005      |
| <b>Cu</b>                          | ICP-OES                      | mg L <sup>-1</sup>  | <0.01       | <0.01       | <0.01       | <0.01       | <0.01       | <0.01       | <0.01       | <0.01       |
| <b>Fe</b>                          | ICP-OES                      | mg L <sup>-1</sup>  | <0.05       | <0.05       | <0.05       | <0.05       | <0.05       | <0.05       | <0.05       | <0.05       |
| <b>Mn</b>                          | ICP-OES                      | mg L <sup>-1</sup>  | <0.005      | <0.005      | <0.005      | <0.005      | <0.005      | <0.005      | 0.008       | 0.084       |
| <b>Ni</b>                          | ICP-OES                      | mg L <sup>-1</sup>  | 0.036       | 0.021       | 0.018       | 0.045       | 0.042       | 0.039       | 0.039       | 0.077       |
| <b>Sr</b>                          | ICP-OES                      | mg L <sup>-1</sup>  | <1          | <1          | <1          | <1          | <1          | <1          | <1          | <1          |
| <b>Zn</b>                          | ICP-OES                      | mg L <sup>-1</sup>  | 0.052       | 0.050       | 0.046       | 0.068       | 0.108       | 0.123       | 0.130       | 0.251       |
| <b>As</b>                          | AAS                          | µg L <sup>-1</sup>  | <4          | <4          | <4          | <4          | <4          | <4          | <4          | <4          |
| <b>F<sup>-</sup></b>               | IC                           | mg L <sup>-1</sup>  | 0.610       | 0.596       | 0.608       | 0.623       | 0.710       | 0.773       | 0.772       | 0.960       |
| <b>Cl<sup>-</sup></b>              | IC                           | mg L <sup>-1</sup>  | 0.176       | 0.264       | 0.170       | 0.179       | 0.175       | 0.147       | 0.126       | 0.220       |
| <b>Br<sup>-</sup></b>              | IC                           | mg L <sup>-1</sup>  | <0.016      | <0.016      | <0.016      | <0.016      | <0.016      | <0.016      | <0.016      | <0.016      |
| <b>NO<sub>3</sub><sup>-</sup></b>  | IC                           | mg L <sup>-1</sup>  | 0.540       | 0.750       | 0.554       | 0.553       | 0.628       | 0.598       | 0.619       | 0.910       |
| <b>SO<sub>4</sub><sup>2-</sup></b> | IC                           | mg L <sup>-1</sup>  | 114         | 95.5        | 94.6        | 101         | 107         | 86.3        | 79.6        | 121         |
| <b>Si</b>                          | ICP-OES                      | mg L <sup>-1</sup>  | 3.18        | 3.01        | 3.05        | 3.08        | 2.97        | 2.70        | 2.57        | 2.67        |
| <b>TOC</b>                         | C-analyzer                   | mg L <sup>-1</sup>  | <0.5        | <0.5        | <0.5        | <0.5        | <0.5        | <0.5        | <0.5        | <0.5        |
| <b>TIC</b>                         | C-analyzer                   | mg L <sup>-1</sup>  | <0.5        | <0.5        | <0.5        | <0.5        | <0.5        | <0.5        | <0.5        | 1.88        |
| <b>TDS</b>                         |                              | mg L <sup>-1</sup>  | 168.36      | 142.98      | 141.86      | 149.19      | 156.26      | 126.58      | 116.69      | 169.40      |

<sup>1</sup> These data were used to derive correlations between the EC and the solute concentrations.

Table S2 continued

| AP10                               | Method                       | Unit                | 02 Jul 2021 | 08 Jul 2021 | 16 Jul 2021 | 06 Aug 2021 | 18 Aug 2021 | 03 Sep 2021 | 22 Sep 2021 | 30 Sep 2021 |
|------------------------------------|------------------------------|---------------------|-------------|-------------|-------------|-------------|-------------|-------------|-------------|-------------|
| <b>T</b>                           | Electrode                    | °C                  | n.a.        | 9.5         | n.a.        | n.a.        | 8.7         | n.a.        | 4.7         | n.a.        |
| <b>pH</b>                          | Electrode                    | -                   | 6.08        | 6.43        | 6.00        | 6.02        | 7.47        | 6.53        | 7.66        | 6.25        |
| <b>EC</b>                          | Electrode of installed probe | µS cm <sup>-1</sup> | 532         | 641         | 574         | 502         | 443         | n.a.        | n.a.        | n.a.        |
| <b>Na<sup>+</sup></b>              | IC                           | mg L <sup>-1</sup>  | 2.60        | 2.84        | 2.69        | 2.42        | 2.31        | 2.30        | 2.42        | 2.58        |
| <b>K<sup>+</sup></b>               | IC                           | mg L <sup>-1</sup>  | <1          | <1          | <1          | <1          | <1          | <1          | <1          | <1          |
| <b>Ca<sup>2+</sup></b>             | IC                           | mg L <sup>-1</sup>  | 42.1        | 50.7        | 45.5        | 40.0        | 35.9        | 39.6        | 42.6        | 47.9        |
| <b>Mg<sup>2+</sup></b>             | IC                           | mg L <sup>-1</sup>  | 36.2        | 45.7        | 39.0        | 33.0        | 28.2        | 29.3        | 31.5        | 36.1        |
| <b>Al</b>                          | ICP-OES                      | mg L <sup>-1</sup>  | 0.186       | 0.402       | 0.278       | 0.116       | 0.081       | 0.146       | 0.064       | <0.05       |
| <b>Co</b>                          | ICP-OES                      | mg L <sup>-1</sup>  | <0.005      | 0.018       | <0.005      | <0.005      | <0.005      | <0.005      | <0.005      | <0.005      |
| <b>Cu</b>                          | ICP-OES                      | mg L <sup>-1</sup>  | <0.01       | <0.01       | <0.01       | <0.01       | <0.01       | <0.01       | <0.01       | <0.01       |
| <b>Fe</b>                          | ICP-OES                      | mg L <sup>-1</sup>  | <0.05       | <0.05       | <0.05       | <0.05       | <0.05       | <0.05       | <0.05       | <0.05       |
| <b>Mn</b>                          | ICP-OES                      | mg L <sup>-1</sup>  | 0.286       | 0.365       | 0.315       | 0.247       | 0.160       | 0.103       | 0.079       | 0.10        |
| <b>Ni</b>                          | ICP-OES                      | mg L <sup>-1</sup>  | 0.190       | 0.245       | 0.206       | 0.171       | 0.138       | 0.136       | 0.134       | 0.154       |
| <b>Sr</b>                          | ICP-OES                      | mg L <sup>-1</sup>  | <1          | <1          | <1          | <1          | <1          | <1          | <1          | <1          |
| <b>Zn</b>                          | ICP-OES                      | mg L <sup>-1</sup>  | 0.526       | 0.624       | 0.560       | 0.459       | 0.388       | 0.349       | 0.333       | 0.408       |
| <b>As</b>                          | AAS                          | µg L <sup>-1</sup>  | <4          | <4          | <4          | <4          | <4          | <4          | <4          | <4          |
| <b>F<sup>-</sup></b>               | IC                           | mg L <sup>-1</sup>  | 1.500       | 1.85        | 1.560       | 1.420       | 1.260       | 1.21        | 1.17        | 1.15        |
| <b>Cl<sup>-</sup></b>              | IC                           | mg L <sup>-1</sup>  | 0.280       | 0.260       | 0.260       | 0.300       | 0.250       | 0.203       | 0.239       | 0.300       |
| <b>Br<sup>-</sup></b>              | IC                           | mg L <sup>-1</sup>  | <0.016      | <0.016      | <0.016      | <0.016      | <0.016      | <0.016      | <0.016      | <0.016      |
| <b>NO<sub>3</sub><sup>-</sup></b>  | IC                           | mg L <sup>-1</sup>  | 0.640       | 0.590       | 0.630       | 0.600       | 0.660       | 0.574       | 0.563       | 0.690       |
| <b>SO<sub>4</sub><sup>2-</sup></b> | IC                           | mg L <sup>-1</sup>  | 244         | 308         | 262         | 227         | 195         | 211         | 229         | 253         |
| <b>Si</b>                          | ICP-OES                      | mg L <sup>-1</sup>  | 3.55        | 2.88        | 3.60        | 3.47        | 3.53        | 3.23        | 3.30        | 3.80        |
| <b>TOC</b>                         | C-analyzer                   | mg L <sup>-1</sup>  | 0.50        | <0.5        | <0.5        | <0.5        | <0.5        | <0.5        | 0.45        | <0.5        |
| <b>TIC</b>                         | C-analyzer                   | mg L <sup>-1</sup>  | 1.41        | 0.96        | 1.54        | 2.05        | 2.54        | <0.5        | 3.05        | <0.5        |
| <b>TDS</b>                         |                              | mg L <sup>-1</sup>  | 334.27      | 416.66      | 357.81      | 311.40      | 271.01      | 288.37      | 315.37      | 346.40      |

**Table S2 continued**

| <b>AP10</b>                        | <b>Method</b>                | <b>Unit</b>         | <b>11 Oct 2021</b> | <b>21 Oct 2021</b> | <b>29 Oct 2021</b> | <b>02 Apr 2022</b> | <b>20 Apr 2022</b> | <b>29 Apr 2022</b> | <b>14 May 2022</b> | <b>19 May 2022</b> |
|------------------------------------|------------------------------|---------------------|--------------------|--------------------|--------------------|--------------------|--------------------|--------------------|--------------------|--------------------|
| <b>T</b>                           | Electrode                    | °C                  | n.a.               | 4                  | n.a.               | 0.6                | n.a.               | n.a.               | n.a.               | 9.5                |
| <b>pH</b>                          | Electrode                    | -                   | 6.38               | 6.67               | 7.07               | 6.81               | 6.85               | 6.19               | 6.41               | 7.73               |
| <b>EC</b>                          | Electrode of installed probe | µS cm <sup>-1</sup> | n.a.               | 300                |
| <b>Na<sup>+</sup></b>              | IC                           | mg L <sup>-1</sup>  | 2.73               | 2.67               | 2.54               | 1.968              | 1.90               | 1.94               | 1.80               | 1.54               |
| <b>K<sup>+</sup></b>               | IC                           | mg L <sup>-1</sup>  | <1                 | <1                 | <1                 | <1                 | <1                 | <1                 | <1                 | <1                 |
| <b>Ca<sup>2+</sup></b>             | IC                           | mg L <sup>-1</sup>  | 52.2               | 51.4               | 51.1               | 36.260             | 33.3               | 33.7               | 33.4               | 27.0               |
| <b>Mg<sup>2+</sup></b>             | IC                           | mg L <sup>-1</sup>  | 40.2               | 38.3               | 37.0               | 17.589             | 16.3               | 17.2               | 21.8               | 18.0               |
| <b>Al</b>                          | ICP-OES                      | mg L <sup>-1</sup>  | <0.05              | <0.05              | <0.05              | <0.05              | <0.05              | <0.05              | <0.05              | 0.08               |
| <b>Co</b>                          | ICP-OES                      | mg L <sup>-1</sup>  | <0.005             | <0.005             | <0.005             | <0.005             | <0.005             | <0.005             | <0.005             | <0.005             |
| <b>Cu</b>                          | ICP-OES                      | mg L <sup>-1</sup>  | <0.01              | <0.01              | <0.01              | <0.01              | <0.01              | <0.01              | <0.01              | <0.01              |
| <b>Fe</b>                          | ICP-OES                      | mg L <sup>-1</sup>  | <0.05              | <0.05              | <0.05              | <0.05              | <0.05              | <0.05              | <0.05              | <0.05              |
| <b>Mn</b>                          | ICP-OES                      | mg L <sup>-1</sup>  | 0.109              | 0.060              | 0.037              | <0.005             | <0.005             | <0.005             | 0.007              | 0.014              |
| <b>Ni</b>                          | ICP-OES                      | mg L <sup>-1</sup>  | 0.173              | 0.156              | 0.138              | 0.021              | 0.019              | 0.023              | 0.068              | 0.063              |
| <b>Sr</b>                          | ICP-OES                      | mg L <sup>-1</sup>  | <1                 | <1                 | <1                 | <1                 | <1                 | <1                 | <1                 | <1                 |
| <b>Zn</b>                          | ICP-OES                      | mg L <sup>-1</sup>  | 0.434              | 0.422              | 0.347              | 0.057              | 0.050              | 0.058              | 0.212              | 0.201              |
| <b>As</b>                          | AAS                          | µg L <sup>-1</sup>  | <4                 | <4                 | <4                 | <4                 | <4                 | <4                 | <4                 | <4                 |
| <b>F<sup>-</sup></b>               | IC                           | mg L <sup>-1</sup>  | 1.10               | 1.04               | 0.964              | 0.531              | 0.555              | 0.576              | 0.818              | 0.834              |
| <b>Cl<sup>-</sup></b>              | IC                           | mg L <sup>-1</sup>  | 0.340              | 2.670              | 0.229              | 0.197              | 0.255              | 0.240              | 0.199              | 0.176              |
| <b>Br<sup>-</sup></b>              | IC                           | mg L <sup>-1</sup>  | <0.016             | <0.016             | <0.016             | <0.016             | <0.016             | <0.016             | <0.016             | <0.016             |
| <b>NO<sub>3</sub><sup>-</sup></b>  | IC                           | mg L <sup>-1</sup>  | 1.16               | 0.890              | 0.702              | 0.581              | 0.686              | 0.624              | 0.962              | 0.630              |
| <b>SO<sub>4</sub><sup>2-</sup></b> | IC                           | mg L <sup>-1</sup>  | 273                | 268                | 265                | 144                | 123                | 137                | 157                | 130                |
| <b>Si</b>                          | ICP-OES                      | mg L <sup>-1</sup>  | 3.92               | 3.87               | 3.326              | 2.922              | n.a.               | n.a.               | n.a.               | n.a.               |
| <b>TOC</b>                         | C-analyzer                   | mg L <sup>-1</sup>  | <0.5               | 0.54               | <0.5               | <0.5               | <0.5               | <0.5               | <0.5               | 1.23               |
| <b>TIC</b>                         | C-analyzer                   | mg L <sup>-1</sup>  | <0.5               | 1.76               | <0.5               | <0.5               | <0.5               | <0.5               | <0.5               | 2.12               |
| <b>TDS</b>                         |                              | mg L <sup>-1</sup>  | 376.54             | 372.63             | 361.63             | 205.40             | 176.51             | 192.01             | 216.41             | 181.95             |

**Table S2 continued**

| <b>AP10</b>                        | <b>Method</b>                | <b>Unit</b>         | <b>19 May 2022</b> | <b>20 May 2022</b> | <b>03 Jun 2022</b> | <b>16 Jun 2022</b> | <b>05 Jul 2022</b> | <b>07 Jul 2022</b> | <b>13 Jul 2022</b> | <b>29 Jul 2022</b> |
|------------------------------------|------------------------------|---------------------|--------------------|--------------------|--------------------|--------------------|--------------------|--------------------|--------------------|--------------------|
| <b>T</b>                           | Electrode                    | °C                  | 6.1                | 5.1                | n.a.               | n.a.               | 11.4               | 9                  | n.a.               | n.a.               |
| <b>pH</b>                          | Electrode                    | -                   | 8.10               | 7.90               | 6.44               | 6.18               | 6.91               | 6.91               | 6.49               | 6.34               |
| <b>EC</b>                          | Electrode of installed probe | μS cm <sup>-1</sup> | 295                | 299                | 491                | n.a.               | n.a.               | n.a.               | 582                | 592                |
| <b>Na<sup>+</sup></b>              | IC                           | mg L <sup>-1</sup>  | 1.52               | 1.63               | 2.29               | 2.58               | 2.88               | 2.91               | 2.70               | 2.74               |
| <b>K<sup>+</sup></b>               | IC                           | mg L <sup>-1</sup>  | <1                 | <1                 | <1                 | <1                 | <1                 | <1                 | <1                 | <1                 |
| <b>Ca<sup>2+</sup></b>             | IC                           | mg L <sup>-1</sup>  | 25.4               | 26.2               | 41.3               | 48.4               | 53.3               | 54.9               | 49.9               | 49.8               |
| <b>Mg<sup>2+</sup></b>             | IC                           | mg L <sup>-1</sup>  | 17.0               | 17.2               | 32.9               | 39.7               | 43.5               | 44.9               | 39.6               | 39.4               |
| <b>Al</b>                          | ICP-OES                      | mg L <sup>-1</sup>  | 0.07               | 0.057              | 0.112              | 0.121              | 0.131              | 0.154              | 0.076              | 0.07               |
| <b>Co</b>                          | ICP-OES                      | mg L <sup>-1</sup>  | <0.005             | <0.005             | <0.005             | <0.005             | <0.005             | <0.005             | <0.005             | <0.005             |
| <b>Cu</b>                          | ICP-OES                      | mg L <sup>-1</sup>  | <0.01              | <0.01              | <0.01              | <0.01              | <0.01              | <0.01              | <0.01              | <0.01              |
| <b>Fe</b>                          | ICP-OES                      | mg L <sup>-1</sup>  | <0.05              | <0.05              | <0.05              | <0.05              | <0.05              | <0.05              | <0.05              | <0.05              |
| <b>Mn</b>                          | ICP-OES                      | mg L <sup>-1</sup>  | 0.020              | 0.013              | 0.142              | 0.176              | 0.199              | 0.208              | 0.152              | 0.128              |
| <b>Ni</b>                          | ICP-OES                      | mg L <sup>-1</sup>  | 0.062              | 0.058              | 0.138              | 0.174              | 0.197              | 0.200              | 0.179              | 0.173              |
| <b>Sr</b>                          | ICP-OES                      | mg L <sup>-1</sup>  | <1                 | <1                 | <1                 | <1                 | <1                 | <1                 | <1                 | <1                 |
| <b>Zn</b>                          | ICP-OES                      | mg L <sup>-1</sup>  | 0.203              | 0.192              | 0.400              | 0.487              | 0.529              | 0.547              | 0.477              | 0.460              |
| <b>As</b>                          | AAS                          | μg L <sup>-1</sup>  | <4                 | <4                 | <4                 | <4                 | <4                 | <4                 | <4                 | <4                 |
| <b>F<sup>-</sup></b>               | IC                           | mg L <sup>-1</sup>  | 0.811              | 0.815              | 1.34               | 1.51               | 1.59               | 1.61               | 1.47               | 1.40               |
| <b>Cl<sup>-</sup></b>              | IC                           | mg L <sup>-1</sup>  | 0.163              | 0.164              | 0.330              | 1.17               | 0.530              | 0.350              | 0.270              | 0.281              |
| <b>Br<sup>-</sup></b>              | IC                           | mg L <sup>-1</sup>  | <0.016             | <0.016             | <0.016             | <0.016             | <0.016             | <0.016             | <0.016             | <0.016             |
| <b>NO<sub>3</sub><sup>-</sup></b>  | IC                           | mg L <sup>-1</sup>  | 0.594              | 0.664              | 0.840              | 1.24               | 0.720              | 0.590              | 0.678              | 0.640              |
| <b>SO<sub>4</sub><sup>2-</sup></b> | IC                           | mg L <sup>-1</sup>  | 117                | 121                | 218                | 254                | 285                | 293                | 273                | 276                |
| <b>Si</b>                          | ICP-OES                      | mg L <sup>-1</sup>  | n.a.               | n.a.               | 2.879              | 2.99               | 3.30               | 3.21               | 3.15               | 3.23               |
| <b>TOC</b>                         | C-analyzer                   | mg L <sup>-1</sup>  | 1.10               | 0.91               | <0.5               | <0.5               | <0.5               | <0.5               | <0.5               | <0.5               |
| <b>TIC</b>                         | C-analyzer                   | mg L <sup>-1</sup>  | 1.89               | 2.38               | <0.5               | <0.5               | 1.59               | 1.66               | <0.5               | <0.5               |
| <b>TDS</b>                         |                              | mg L <sup>-1</sup>  | 166.26             | 171.33             | 300.45             | 353.18             | 393.16             | 404.11             | 372.32             | 375.56             |

**Table S2 continued**

| <b>AP10</b>                        | <b>Method</b>                | <b>Unit</b>         | <b>12 Aug 2022</b> | <b>26 Aug 2022</b> | <b>13 Sep 2022</b> | <b>30 Sep 2022</b> | <b>10 Oct 2022</b> | <b>28 Oct 2022</b> | <b>15 Nov 2022</b> |
|------------------------------------|------------------------------|---------------------|--------------------|--------------------|--------------------|--------------------|--------------------|--------------------|--------------------|
| <b>T</b>                           | Electrode                    | °C                  | 10                 | n.a.               | n.a.               | n.a.               | 6.8                | n.a.               | n.a.               |
| <b>pH</b>                          | Electrode                    | -                   | 7.10               | 6.70               | 6.12               | 6.30               | 7.27               | 6.43               | 6.29               |
| <b>EC</b>                          | Electrode of installed probe | µS cm <sup>-1</sup> | 629                | 629                | 677                | 599                | 590                | n.a.               | n.a.               |
| <b>Na<sup>+</sup></b>              | IC                           | mg L <sup>-1</sup>  | 2.83               | 2.25               | 2.23               | 2.02               | 2.72               | 2.327              | 2.182              |
| <b>K<sup>+</sup></b>               | IC                           | mg L <sup>-1</sup>  | <1                 | <1                 | <1                 | <1                 | <1                 | <1                 | <1                 |
| <b>Ca<sup>2+</sup></b>             | IC                           | mg L <sup>-1</sup>  | 53.8               | 54.5               | 61.6               | 51.9               | 53.1               | 41.6               | 37.9               |
| <b>Mg<sup>2+</sup></b>             | IC                           | mg L <sup>-1</sup>  | 42.8               | 42.8               | 47.9               | 39.6               | 39.9               | 30.3               | 24.9               |
| <b>Al</b>                          | ICP-OES                      | mg L <sup>-1</sup>  | 0.08               | 0.10               | 0.18               | 0.094              | 0.067              | 0.10               | <0.05              |
| <b>Co</b>                          | ICP-OES                      | mg L <sup>-1</sup>  | <0.005             | <0.005             | <0.005             | <0.005             | <0.005             | <0.005             | <0.005             |
| <b>Cu</b>                          | ICP-OES                      | mg L <sup>-1</sup>  | <0.01              | <0.01              | <0.01              | <0.01              | <0.01              | <0.01              | <0.01              |
| <b>Fe</b>                          | ICP-OES                      | mg L <sup>-1</sup>  | <0.05              | <0.05              | <0.05              | <0.05              | <0.05              | <0.05              | <0.05              |
| <b>Mn</b>                          | ICP-OES                      | mg L <sup>-1</sup>  | 0.155              | 0.157              | 0.193              | 0.122              | 0.109              | 0.101              | 0.023              |
| <b>Ni</b>                          | ICP-OES                      | mg L <sup>-1</sup>  | 0.189              | 0.19               | 0.21               | 0.17               | 0.16               | 0.12               | 0.08               |
| <b>Sr</b>                          | ICP-OES                      | mg L <sup>-1</sup>  | <1                 | <1                 | <1                 | <1                 | <1                 | <1                 | <1                 |
| <b>Zn</b>                          | ICP-OES                      | mg L <sup>-1</sup>  | 0.516              | 0.525              | 0.601              | 0.489              | 0.446              | 0.364              | 0.252              |
| <b>As</b>                          | AAS                          | µg L <sup>-1</sup>  | <4                 | <4                 | <4                 | <4                 | <4                 | <4                 | <4                 |
| <b>F<sup>-</sup></b>               | IC                           | mg L <sup>-1</sup>  | 1.47               | 1.51               | 1.62               | 1.38               | 1.37               | 1.270              | 1.050              |
| <b>Cl<sup>-</sup></b>              | IC                           | mg L <sup>-1</sup>  | 0.273              | 0.287              | 0.340              | 0.302              | 0.305              | 0.326              | 0.252              |
| <b>Br<sup>-</sup></b>              | IC                           | mg L <sup>-1</sup>  | <0.016             | <0.016             | <0.016             | <0.016             | <0.016             | <0.016             | <0.016             |
| <b>NO<sub>3</sub><sup>-</sup></b>  | IC                           | mg L <sup>-1</sup>  | 0.687              | 0.677              | 0.832              | 0.756              | 0.758              | 0.853              | 0.831              |
| <b>SO<sub>4</sub><sup>2-</sup></b> | IC                           | mg L <sup>-1</sup>  | 292                | 290                | 327                | 274                | 270                | 211.170            | 178.450            |
| <b>Si</b>                          | ICP-OES                      | mg L <sup>-1</sup>  | 3.39               | 3.33               | 3.42               | 3.55               | 3.23               | 3.67               | 3.65               |
| <b>TOC</b>                         | C-analyzer                   | mg L <sup>-1</sup>  | <0.5               | <0.5               | <0.5               | <0.5               | <0.5               | <0.5               | <0.5               |
| <b>TIC</b>                         | C-analyzer                   | mg L <sup>-1</sup>  | 1.92               | <0.5               | <0.5               | <0.5               | 2.32               | <0.5               | <0.5               |
| <b>TDS</b>                         |                              | mg L <sup>-1</sup>  | 400.80             | 397.44             | 447.31             | 375.29             | 375.63             | 292.99             | 250.37             |

**Table S3: Chemical analysis of streamwater samples collected between June 2021 and October 2022 at the AP5 location of the Aua Prasiira stream (Fig. 1).**

| AP5                                | Method     | Unit                | 11 Jun 2021 | 09 Jul 2021 | 20 Aug 2021 | 23 Sep 2021 | 20 Oct 2021 | 06 Jul 2022 | 13 Aug 2022 | 11 Oct 2022 |
|------------------------------------|------------|---------------------|-------------|-------------|-------------|-------------|-------------|-------------|-------------|-------------|
| <b>T</b>                           | Electrode  | °C                  | 1.4         | 4.9         | 5.7         | 4.9         | 2.5         | 8.9         | 6           | 5.4         |
| <b>pH</b>                          | Electrode  | -                   | 5.71        | 5.60        | 5.54        | 5.32        | 5.56        | 5.57        | 5.63        | 5.68        |
| <b>EC</b>                          | Electrode  | µS cm <sup>-1</sup> | 567         | 1200        | 1557        | 1935        | 1859        | 1418        | 1612        | 1759        |
| <b>Na<sup>+</sup></b>              | IC         | mg L <sup>-1</sup>  | 2.55        | 4.97        | 6.14        | 7.64        | 8.07        | 4.56        | 6.72        | 6.97        |
| <b>K<sup>+</sup></b>               | IC         | mg L <sup>-1</sup>  | <1          | <1          | 1.03        | 1.07        | 1.05        | 1.12        | 1.07        | 1.06        |
| <b>Ca<sup>2+</sup></b>             | IC         | mg L <sup>-1</sup>  | 49.6        | 94.8        | 123         | 168         | 162         | 126         | 138.9       | 157         |
| <b>Mg<sup>2+</sup></b>             | IC         | mg L <sup>-1</sup>  | 42.4        | 109         | 154         | 206         | 194         | 139         | 161.1       | 179         |
| <b>Al</b>                          | ICP-OES    | mg L <sup>-1</sup>  | 1.42        | 5.35        | 7.761       | 8.30        | 7.32        | 6.62        | 7.84        | 7.60        |
| <b>Co</b>                          | ICP-OES    | mg L <sup>-1</sup>  | 0.013       | 0.058       | <0.005      | 0.029       | <0.005      | 0.031       | 0.028       | 0.024       |
| <b>Cu</b>                          | ICP-OES    | mg L <sup>-1</sup>  | <0.01       | <0.01       | <0.01       | 0.067       | 0.072       | 0.0625      | 0.0682      | 0.06        |
| <b>Fe</b>                          | ICP-OES    | mg L <sup>-1</sup>  | <0.05       | <0.05       | <0.05       | <0.05       | <0.05       | <0.05       | <0.05       | <0.05       |
| <b>Mn</b>                          | ICP-OES    | mg L <sup>-1</sup>  | 0.079       | 1.415       | 1.73        | 1.60        | 1.47        | 1.381       | 1.56        | 1.41        |
| <b>Ni</b>                          | ICP-OES    | mg L <sup>-1</sup>  | 0.185       | 0.733       | 1.001       | 1.225       | 1.155       | 0.847       | 1.01        | 1.06        |
| <b>Sr</b>                          | ICP-OES    | mg L <sup>-1</sup>  | <1          | <1          | <1          | <1          | <1          | <1          | <1          | <1          |
| <b>Zn</b>                          | ICP-OES    | mg L <sup>-1</sup>  | 0.560       | 1.764       | 2.61        | 3.007       | 2.871       | 2.22        | 2.69        | 2.851       |
| <b>As</b>                          | AAS        | µg L <sup>-1</sup>  | <4          | <4          | <4          | <4          | <4          | <4          | <4          | <4          |
| <b>F<sup>-</sup></b>               | IC         | mg L <sup>-1</sup>  | 1.877       | 5.65        | 3.200       | 2.89        | 2.46        | 6.47        | 0.468       | 1.55        |
| <b>Cl<sup>-</sup></b>              | IC         | mg L <sup>-1</sup>  | 0.250       | 0.500       | 0.680       | 0.944       | 2.71        | 0.780       | 0.829       | 0.831       |
| <b>Br<sup>-</sup></b>              | IC         | mg L <sup>-1</sup>  | <0.016      | <0.016      | <0.016      | <0.016      | <0.016      | <0.016      | <0.016      | <0.016      |
| <b>NO<sub>3</sub><sup>-</sup></b>  | IC         | mg L <sup>-1</sup>  | 0.656       | 0.860       | 0.930       | 0.840       | 1.21        | 0.920       | 0.925       | 1.042       |
| <b>SO<sub>4</sub><sup>2-</sup></b> | IC         | mg L <sup>-1</sup>  | 285         | 679         | 965         | 1287        | 1212        | 822         | 1033        | 1141        |
| <b>Si</b>                          | ICP-OES    | mg L <sup>-1</sup>  | 2.74        | 3.68        | 6.47        | 5.20        | 7.03        | 4.81        | 5.54        | 5.58        |
| <b>TOC</b>                         | C-analyzer | mg L <sup>-1</sup>  | 0.51        | <0.5        | 0.63        | 0.57        | 0.63        | <0.5        | 0.55        | 0.87        |
| <b>TIC</b>                         | C-analyzer | mg L <sup>-1</sup>  | <0.5        | <0.5        | <0.5        | 0.50        | 0.59        | <0.5        | 0.53        | 0.52        |
| <b>TDS</b>                         |            | mg L <sup>-1</sup>  | 387.98      | 909.05      | 1274.47     | 1695.86     | 1604.66     | 1117.13     | 1363.17     | 1509.12     |

**Table S4: Chemical analysis of streamwater samples collected between August 2021 and October 2022 at the AP1\_2 location of the Aua Prasūra stream (Fig. 1).**

| AP1_2                              | Method     | Unit  | 20 Aug 2021 | 23 Sep 2021 | 20 Oct 2021 | 06 Jul 2022 | 13 Aug 2022 | 11 Oct 2022 |
|------------------------------------|------------|-------|-------------|-------------|-------------|-------------|-------------|-------------|
| <b>T</b>                           | Electrode  | °C    | 4.7         | 3.2         | 2.1         | 7.6         | 5           | 4           |
| <b>pH</b>                          | Electrode  | -     | 4.84        | 5.04        | 5.15        | 5.19        | 5.35        | 5.27        |
| <b>EC</b>                          | Electrode  | μS/cm | 2173        | 2578        | 2331        | 1777        | 2045        | 2019        |
| <b>Na<sup>+</sup></b>              | IC         | mg/L  | 9.33        | 10.08       | 9.90        | 6.19        | 9.16        | 9.93        |
| <b>K<sup>+</sup></b>               | IC         | mg/L  | 1.38        | 1.38        | 1.30        | 1.13        | 1.34        | 1.63        |
| <b>Ca<sup>2+</sup></b>             | IC         | mg/L  | 171         | 224         | 209         | 158         | 177.1       | 222         |
| <b>Mg<sup>2+</sup></b>             | IC         | mg/L  | 237         | 301         | 255         | 187         | 224.1       | 281         |
| <b>Al</b>                          | ICP-OES    | mg/L  | 13.011      | 12.57       | 9.456       | 9.87        | 12.113      | 13.73       |
| <b>Co</b>                          | ICP-OES    | mg/L  | 0.095       | 0.051       | <0.005      | 0.052       | 0.043       | 0.050       |
| <b>Cu</b>                          | ICP-OES    | mg/L  | <0.01       | 0.111       | 0.095       | 0.1020      | 0.1142      | 0.12        |
| <b>Fe</b>                          | ICP-OES    | mg/L  | <0.05       | <0.05       | <0.05       | <0.05       | <0.05       | <0.05       |
| <b>Mn</b>                          | ICP-OES    | mg/L  | 3.06        | 2.67        | 1.935       | 2.177       | 2.53        | 3.21        |
| <b>Ni</b>                          | ICP-OES    | mg/L  | 1.522       | 1.679       | 1.369       | 1.173       | 1.40        | 1.73        |
| <b>Sr</b>                          | ICP-OES    | mg/L  | <1          | <1          | <1          | <1          | <1          | <1          |
| <b>Zn</b>                          | ICP-OES    | mg/L  | 3.50        | 3.849       | 3.008       | 2.81        | 3.50        | 4.209       |
| <b>As</b>                          | AAS        | μg/L  | <4          | <4          | <4          | <4          | <4          | <4          |
| <b>F<sup>-</sup></b>               | IC         | mg/L  | 11.890      | 4.46        | 3.42        | 9.02        | 0.529       | 1.22        |
| <b>Cl<sup>-</sup></b>              | IC         | mg/L  | 1.060       | 1.29        | 1.30        | 1.11        | 1.03        | 1.33        |
| <b>Br<sup>-</sup></b>              | IC         | mg/L  | <0.016      | 0.018       | <0.016      | <0.016      | <0.016      | 0.019       |
| <b>NO<sub>3</sub><sup>-</sup></b>  | IC         | mg/L  | 1.150       | 0.054       | 1.20        | 0.800       | 1.012       | 0.067       |
| <b>SO<sub>4</sub><sup>2-</sup></b> | IC         | mg/L  | 1470        | 1821        | 1660        | 1083        | 1369        | 1687        |
| <b>Si</b>                          | ICP-OES    | mg/L  | 7.06        | 5.43        | 7.32        | 4.925       | 5.79        | 6.25        |
| <b>TOC</b>                         | C-analyzer | mg/L  | <0.5        | 0.51        | 0.78        | <0.5        | 0.74        | <0.5        |
| <b>TIC</b>                         | C-analyzer | mg/L  | <0.5        | 0.64        | 0.76        | <0.5        | 0.61        | 0.67        |
| <b>TDS</b>                         |            | mg/L  | 1931.87     | 2394.77     | 2180.57     | 1470.48     | 1814.70     | 2458.31     |

**Table S5: Chemical analysis of streamwater samples collected between July 2021 and October 2022 at the AP3 location of the Aua Prasiira stream (Fig. 1).**

| <b>AP3</b>                         | <b>Method</b> | <b>Unit</b>         | <b>09 Jul 2021</b> | <b>20 Aug 2021</b> | <b>23 Sep 2021</b> | <b>06 Jul 2022</b> | <b>13 Aug 2022</b> | <b>11 Oct 2022</b> |
|------------------------------------|---------------|---------------------|--------------------|--------------------|--------------------|--------------------|--------------------|--------------------|
| <b>T</b>                           | Electrode     | °C                  | 2.9                | 3.5                | 4.1                | 4.7                | 5                  | 3.5                |
| <b>pH</b>                          | Electrode     | -                   | 6.37               | 6.04               | 5.77               | 6.35               | 6.21               | 5.98               |
| <b>EC</b>                          | Electrode     | µS cm <sup>-1</sup> | 687                | 1147               | 1402               | 1035               | 1329               | 1333               |
| <b>Na<sup>+</sup></b>              | IC            | mg L <sup>-1</sup>  | 3.16               | 4.87               | 8.91               | 3.50               | 5.89               | 5.38               |
| <b>K<sup>+</sup></b>               | IC            | mg L <sup>-1</sup>  | <1                 | <1                 | <1                 | <1                 | <1                 | <1                 |
| <b>Ca<sup>2+</sup></b>             | IC            | mg L <sup>-1</sup>  | 88.0               | 152                | 190                | 138                | 171.9              | 165                |
| <b>Mg<sup>2+</sup></b>             | IC            | mg L <sup>-1</sup>  | 40.1               | 67.9               | 94.3               | 66.9               | 86.0               | 80.7               |
| <b>Al</b>                          | ICP-OES       | mg L <sup>-1</sup>  | 0.466              | 1.254              | 1.47               | 0.55               | 0.69               | 0.96               |
| <b>Co</b>                          | ICP-OES       | mg L <sup>-1</sup>  | <0.005             | <0.005             | <0.005             | <0.005             | <0.005             | <0.005             |
| <b>Cu</b>                          | ICP-OES       | mg L <sup>-1</sup>  | <0.01              | <0.01              | <0.01              | <0.01              | <0.01              | <0.01              |
| <b>Fe</b>                          | ICP-OES       | mg L <sup>-1</sup>  | <0.05              | <0.05              | <0.05              | <0.05              | <0.05              | <0.05              |
| <b>Mn</b>                          | ICP-OES       | mg L <sup>-1</sup>  | 0.063              | <0.005             | 0.009              | 0.014              | 0.015              | 0.017              |
| <b>Ni</b>                          | ICP-OES       | mg L <sup>-1</sup>  | 0.096              | 0.078              | 0.118              | 0.051              | 0.064              | 0.08               |
| <b>Sr</b>                          | ICP-OES       | mg L <sup>-1</sup>  | <1                 | <1                 | <1                 | <1                 | <1                 | <1                 |
| <b>Zn</b>                          | ICP-OES       | mg L <sup>-1</sup>  | 0.180              | 0.149              | 0.202              | 0.122              | 0.131              | 0.182              |
| <b>As</b>                          | AAS           | µg L <sup>-1</sup>  | <4                 | <4                 | <4                 | <4                 | <4                 | <4                 |
| <b>F<sup>-</sup></b>               | IC            | mg L <sup>-1</sup>  | 1.38               | 4.280              | 2.26               | 1.59               | 1.71               | 1.52               |
| <b>Cl<sup>-</sup></b>              | IC            | mg L <sup>-1</sup>  | 0.550              | 0.320              | 0.514              | 0.460              | 0.749              | 0.350              |
| <b>Br<sup>-</sup></b>              | IC            | mg L <sup>-1</sup>  | <0.016             | <0.016             | <0.016             | <0.016             | <0.016             | <0.016             |
| <b>NO<sub>3</sub><sup>-</sup></b>  | IC            | mg L <sup>-1</sup>  | 0.730              | 0.870              | 0.689              | 1.25               | 1.075              | 0.960              |
| <b>SO<sub>4</sub><sup>2-</sup></b> | IC            | mg L <sup>-1</sup>  | 369                | 666                | 870                | 546                | 735                | 685                |
| <b>Si</b>                          | ICP-OES       | mg L <sup>-1</sup>  | 3.00               | 7.11               | 4.16               | 3.66               | 4.17               | 4.32               |
| <b>TOC</b>                         | C-analyzer    | mg L <sup>-1</sup>  | <0.5               | <0.5               | <0.5               | <0.5               | <0.5               | <0.5               |
| <b>TIC</b>                         | C-analyzer    | mg L <sup>-1</sup>  | 1.82               | 2.97               | 4.31               | 4.12               | 4.79               | 6.39               |
| <b>TDS</b>                         |               | mg L <sup>-1</sup>  | 509.35             | 908.06             | 1177.59            | 766.47             | 1013.72            | 952.44             |



130 1). **Table S6: Chemical analysis of streamwater samples collected between July 2021 and October 2022 at the AP2 location of the Aua Prasiira stream (Fig.**

| AP2                                | Method     | Unit                | 09 Jul 2021 | 20 Aug 2021 | 06 Jul 2022 | 13 Aug 2022 | 11 Oct 2022 |
|------------------------------------|------------|---------------------|-------------|-------------|-------------|-------------|-------------|
| <b>T</b>                           | Electrode  | °C                  | 0.3         | 3.1         | 0.4         | 0           | 1           |
| <b>pH</b>                          | Electrode  | -                   | 5.25        | 5.23        | 5.14        | 5.23        | 5.1         |
| <b>EC</b>                          | Electrode  | μS cm <sup>-1</sup> | 749         | 1204        | 1296        | 1998        | 290         |
| <b>Na<sup>+</sup></b>              | IC         | mg L <sup>-1</sup>  | 2.95        | 4.44        | 3.82        | 7.49        | 12.05       |
| <b>K<sup>+</sup></b>               | IC         | mg L <sup>-1</sup>  | <1          | <1          | 1.13        | 2.82        | 1.93        |
| <b>Ca<sup>2+</sup></b>             | IC         | mg L <sup>-1</sup>  | 72.4        | 119         | 152         | 242.0       | 375         |
| <b>Mg<sup>2+</sup></b>             | IC         | mg L <sup>-1</sup>  | 51.2        | 76.8        | 111         | 165.4       | 276         |
| <b>Al</b>                          | ICP-OES    | mg L <sup>-1</sup>  | 2.68        | 2.728       | 6.06        | 9.151       | 10.83       |
| <b>Co</b>                          | ICP-OES    | mg L <sup>-1</sup>  | 0.052       | <0.005      | 0.087       | 0.152       | 0.250       |
| <b>Cu</b>                          | ICP-OES    | mg L <sup>-1</sup>  | <0.01       | <0.01       | 0.0991      | 0.1354      | 0.16        |
| <b>Fe</b>                          | ICP-OES    | mg L <sup>-1</sup>  | <0.05       | <0.05       | <0.05       | <0.05       | <0.05       |
| <b>Mn</b>                          | ICP-OES    | mg L <sup>-1</sup>  | 0.547       | 0.268       | 1.196       | 2.02        | 3.39        |
| <b>Ni</b>                          | ICP-OES    | mg L <sup>-1</sup>  | 0.350       | 0.361       | 0.707       | 1.05        | 1.63        |
| <b>Sr</b>                          | ICP-OES    | mg L <sup>-1</sup>  | <1          | <1          | <1          | <1          | <1          |
| <b>Zn</b>                          | ICP-OES    | mg L <sup>-1</sup>  | 0.737       | 0.961       | 1.31        | 1.80        | 2.489       |
| <b>As</b>                          | AAS        | μg L <sup>-1</sup>  | <4          | <4          | <4          | <4          | <4          |
| <b>F<sup>-</sup></b>               | IC         | mg L <sup>-1</sup>  | 2.92        | 4.780       | 5.63        | 0.376       | 0.632       |
| <b>Cl<sup>-</sup></b>              | IC         | mg L <sup>-1</sup>  | 0.290       | 0.460       | 0.580       | 4.59        | 1.199       |
| <b>Br<sup>-</sup></b>              | IC         | mg L <sup>-1</sup>  | <0.016      | <0.016      | <0.016      | <0.016      | 0.021       |
| <b>NO<sub>3</sub><sup>-</sup></b>  | IC         | mg L <sup>-1</sup>  | 1.74        | 1.120       | 1.64        | 1.921       | 0.097       |
| <b>SO<sub>4</sub><sup>2-</sup></b> | IC         | mg L <sup>-1</sup>  | 415         | 654         | 777         | 1297        | 1986        |
| <b>Si</b>                          | ICP-OES    | mg L <sup>-1</sup>  | 2.26        | 5.16        | 3.76        | 4.78        | 5.71        |
| <b>TOC</b>                         | C-analyzer | mg L <sup>-1</sup>  | <0.5        | <0.5        | <0.5        | <0.5        | <0.5        |
| <b>TIC</b>                         | C-analyzer | mg L <sup>-1</sup>  | 0.72        | 1.13        | 2.27        | 5.00        | 5.47        |
| <b>TDS</b>                         |            | mg L <sup>-1</sup>  | 554.83      | 871.57      | 1068.66     | 1745.73     | 2682.63     |

135 **Table S7: Chemical analysis of streamwater samples collected between July 2021 and October 2022 at the AP1 location of the Aua Prasiira stream (Fig. 1).**

| <b>AP1</b>                         | <b>Method</b> | <b>Unit</b>         | <b>09 Jul 2021</b> | <b>20 Aug 2021</b> | <b>06 Jul 2022</b> | <b>13 Aug 2022</b> | <b>11 Oct 2022</b> |
|------------------------------------|---------------|---------------------|--------------------|--------------------|--------------------|--------------------|--------------------|
| <b>T</b>                           | Electrode     | °C                  | 0.8                | 1.4                | 1                  | 1.9                | 1                  |
| <b>pH</b>                          | Electrode     | -                   | 4.90               | 4.90               | 5.02               | 4.9                | 4.70               |
| <b>EC</b>                          | Electrode     | μS cm <sup>-1</sup> | 2186               | 3097               | 2808               | 3053               | 3701               |
| <b>Na<sup>+</sup></b>              | IC            | mg L <sup>-1</sup>  | 8.06               | 11.3               | 8.95               | 11.47              | 14.52              |
| <b>K<sup>+</sup></b>               | IC            | mg L <sup>-1</sup>  | 1.61               | 2.07               | 2.16               | 2.03               | 1.95               |
| <b>Ca<sup>2+</sup></b>             | IC            | mg L <sup>-1</sup>  | 162                | 230                | 205                | 216.6              | 272                |
| <b>Mg<sup>2+</sup></b>             | IC            | mg L <sup>-1</sup>  | 234                | 389                | 353                | 387.7              | 493                |
| <b>Al</b>                          | ICP-OES       | mg L <sup>-1</sup>  | 15.44              | 23.447             | 26.7               | 27.50              | 28.74              |
| <b>Co</b>                          | ICP-OES       | mg L <sup>-1</sup>  | 0.280              | 0.325              | 0.396              | 0.336              | 0.433              |
| <b>Cu</b>                          | ICP-OES       | mg L <sup>-1</sup>  | <0.01              | <0.01              | 0.3190             | 0.3207             | 0.32               |
| <b>Fe</b>                          | ICP-OES       | mg L <sup>-1</sup>  | <0.05              | <0.05              | <0.05              | <0.05              | <0.05              |
| <b>Mn</b>                          | ICP-OES       | mg L <sup>-1</sup>  | 4.761              | 7.67               | 8.174              | 8.62               | 11.27              |
| <b>Ni</b>                          | ICP-OES       | mg L <sup>-1</sup>  | 1.689              | 2.520              | 2.536              | 2.78               | 3.31               |
| <b>Sr</b>                          | ICP-OES       | mg L <sup>-1</sup>  | <1                 | <1                 | <1                 | <1                 | <1                 |
| <b>Zn</b>                          | ICP-OES       | mg L <sup>-1</sup>  | 4.214              | 5.95               | 6.96               | 7.23               | 7.812              |
| <b>As</b>                          | AAS           | μg L <sup>-1</sup>  | <4                 | <4                 | 4.06               | <4                 | <4                 |
| <b>F<sup>-</sup></b>               | IC            | mg L <sup>-1</sup>  | 15.7               | 8.770              | 23.0               | 2.13               | 6.17               |
| <b>Cl<sup>-</sup></b>              | IC            | mg L <sup>-1</sup>  | 1.07               | 1.470              | 1.40               | 1.50               | 1.49               |
| <b>Br<sup>-</sup></b>              | IC            | mg L <sup>-1</sup>  | <0.016             | <0.016             | <0.016             | 0.021              | 0.018              |
| <b>NO<sub>3</sub><sup>-</sup></b>  | IC            | mg L <sup>-1</sup>  | 1.06               | 1.240              | 1.31               | 0.044              | 0.043              |
| <b>SO<sub>4</sub><sup>2-</sup></b> | IC            | mg L <sup>-1</sup>  | 1354               | 2318               | 2020               | 2246               | 2803               |
| <b>Si</b>                          | ICP-OES       | mg L <sup>-1</sup>  | 5.89               | 8.86               | 7.38               | 7.61               | 8.10               |
| <b>TOC</b>                         | C-analyzer    | mg L <sup>-1</sup>  | <0.5               | <0.5               | <0.5               | <0.5               | <0.5               |
| <b>TIC</b>                         | C-analyzer    | mg L <sup>-1</sup>  | 1.69               | 2.76               | 1.80               | 5.40               | 3.29               |
| <b>TDS</b>                         |               | mg L <sup>-1</sup>  | 1810.24            | 3014.10            | 2674.23            | 2928.22            | 3656.77            |

## References

- Calkins D. and Dunne T. (1970) A salt tracing method for measuring channel velocities in small mountain streams. *J. Hydrol.* **11**, 379–392.
- Day T. J. (1977) Observed mixing lengths in mountain streams. *J. Hydrol.* **35**, 125–136.
- Leibundgut C., Maloszewski P. and Külls C. (2009) Tracers in Hydrology. *Tracers Hydrol.*, 1–415.
- 145 Maillet E. (1905) Essais d'Hydraulique souterraine et fluviale. *Nature* **72**, 25–26.
- MeteoSwiss:<https://www.meteoschweiz.admin.ch/service-und-publikationen/applikationen/messwerte-und-messnetze.html#lang=de&swisstopoApiKey=cpZJOL3HuO5yENksi97q&param=messwerte-niederschlag-10min&station=SMM&chart=month>, last access: 11 January 2024.
